# Supplementary material
Source: PubMed Central journal article supplement (PMC2673720)
Supplement: NIHMS68951-supplement-Fig_Legend.pdf [file NIHMS68951-supplement-Fig_Legend.pdf]

### Supplementary Figure Legends:

**Supple. Fig. 1.** Picroliv does not inhibit TNFR1. KBM-5 cells ( $2 \times 10^6$ ) were incubated with picroliv at different concentrations for 12 h prepared whole cell lysate and assayed for TNFR1 expression by western blot (*bottom panel*). *B*, Picroliv induced NF- $\kappa$ B inhibition is not reversible. U266 cells ( $2 \times 10^6$ ) were treated with picroliv 150  $\mu$ g/ml for 12 h, washed 2 times in PBS, suspended in fresh medium, cells were harvested in different time intervals, nuclear extracts were prepared and NF- $\kappa$ B activity was analyzed by EMSA. *C*. NF- $\kappa$ B induced by TNF consists of p50 and p65 subunits, and its binding to DNA is specific. Nuclear extracts of KBM-5 cells ( $2 \times 10^6$  cells/mL) left untreated or treated with TNF (0.1 nM) were incubated with different antibodies or unlabeled NF- $\kappa$ B oligonucleotide probes at 37°C for 30 min and then tested for NF- $\kappa$ B activation using EMSA.
