# Supplementary material
Source: PubMed Central journal article supplement (PMC2673720)

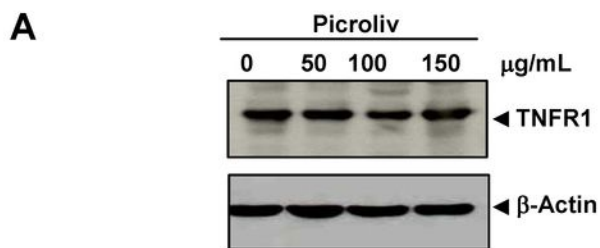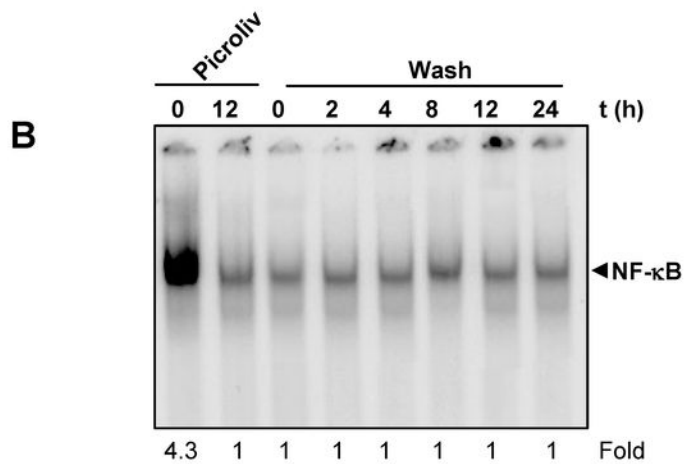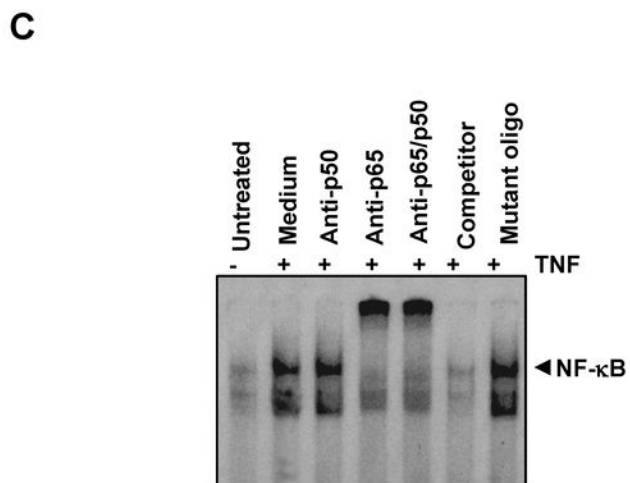

Supplement: NIHMS68951-supplement-Fig_S1.pdf [file NIHMS68951-supplement-Fig_S1.pdf]
